# Supplementary material for: Single-molecule analysis of DNA replication reveals novel features in the divergent eukaryotes Leishmania and Trypanosoma brucei versus mammalian cells
Source: PubMed Central journal article supplement (PMC4791591; doi:10.1038/srep23142), 2016-03-15
Supplement: srep23142-s1.pdf [file srep23142-s1.pdf]

## SUPPLEMENTAL MATERIAL

### Single-molecule analysis of DNA replication reveals novel features in the divergent eukaryotes *Leishmania* and *Trypanosoma brucei* versus mammalian cells

Slavica Stanojic, Lauriane Sollelis, Nada Kuk, Lucien Crobu, Yves Balard, Etienne Schwob, Patrick Bastien, Michel Pagès and Yvon Sterkers

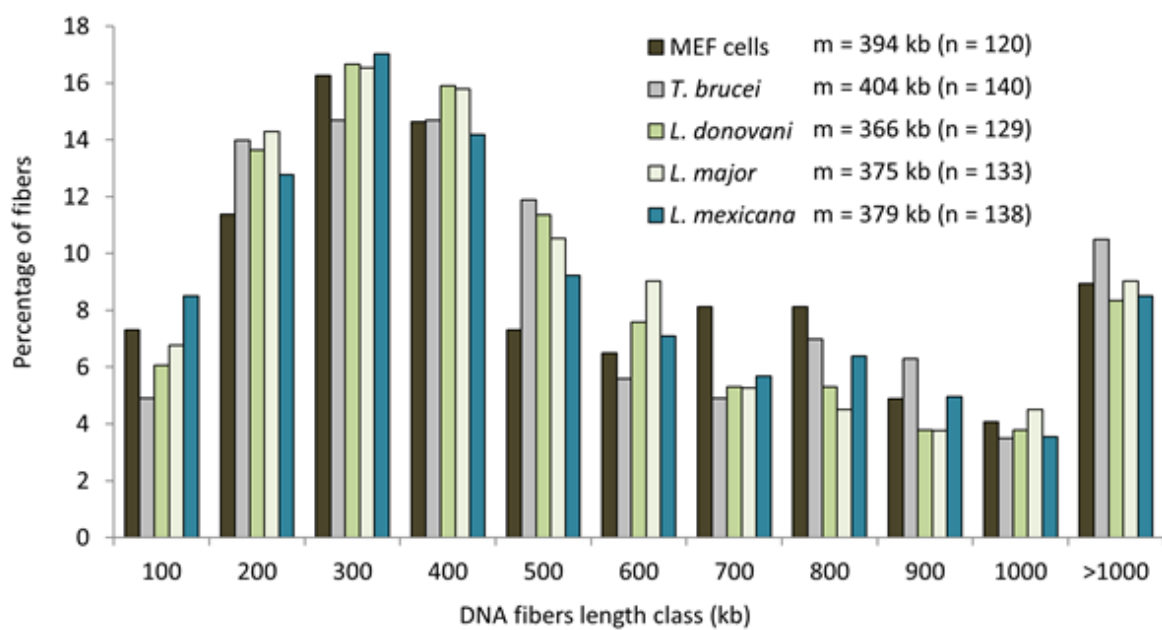

**Supplemental Fig 1. Distribution of length classes of DNA fibers in MEF cells, *T. brucei* and three *Leishmania* species.**

DNA fibers combed on the coverslips were measured. The median fiber length in kb (m) and the number of measures (n) are indicated for each sample.
